# Supplementary material
Source: Research Square preprint supplement (doi:10.21203/rs.3.rs-10134229/v1)
Supplement: Supplementary file 1 [file 7fa687c995f8289e061bdbbc.docx]

*Supporting Information*

**Performance Differences of Copper Paste in Different types of Composite Resin Systems During IPL sintering**

Ruihan Lu1,2, Zhenguo Liu1,2,*, Fawang He3, Mengjing Yang3, Jiali Wang3, Haiyan Yan4, Yuanzheng Shen2, Baozhi He3

*School of Chemistry and Chemical Engineering, Northwestern Polytechnical University, 1 Dongxiang Road, Xi'an, 710129, China*

E-mail: iamzgliu@ nwpu.edu.cn


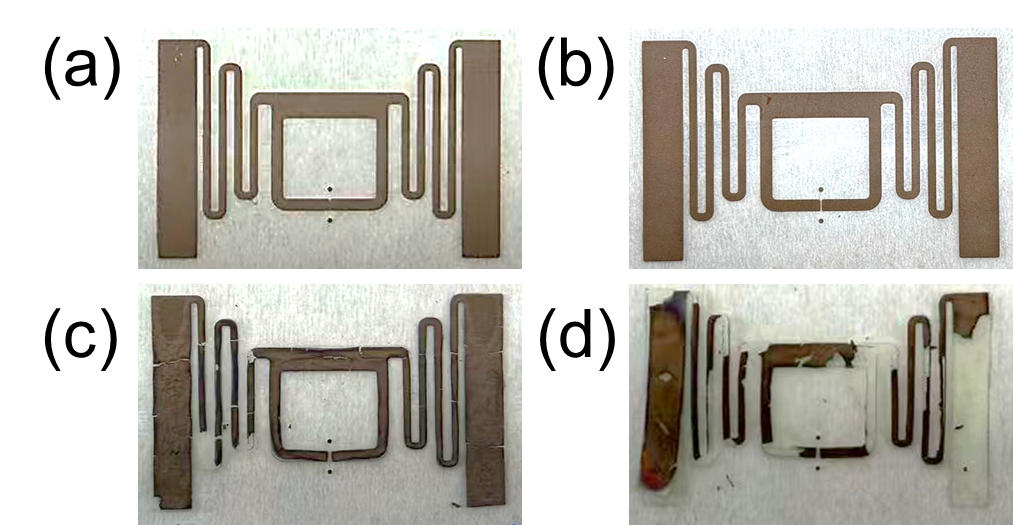
**S- 1**

**Fig S1.** Images of (a-b) un-sintered copper pattern and (c-d) broken copper pattern.
